1 **Lamin A/C phosphorylation at serine 22 is a conserved heat shock response to**  
2 **regulate nuclear adaptation during stress**

3 Laura Virtanen<sup>1\*</sup>, Emilia Holm<sup>2</sup>, Mona Halme<sup>1</sup>, Gun West<sup>1</sup>, Fanny Lindholm<sup>1</sup>, Josef  
4 Gullmets<sup>1,2</sup>, Juho Irjala<sup>1</sup>, Tiina Heliö<sup>4</sup>, Artur Padzik<sup>5</sup>, Annika Meinander<sup>2</sup>, John E. Eriksson<sup>2,3</sup>  
5 and Pekka Taimen<sup>1,6</sup>

6 1. Institute of Biomedicine and FICAN West Cancer Centre, University of Turku, 20520  
7 Turku, Finland

8 2. Faculty of Science and Engineering, Åbo Akademi University, 20520 Turku, Finland.

9 3. Turku Bioscience Centre, University of Turku and Åbo Akademi University, 20520 Turku,  
10 Finland.

11 4. Heart and Lung Center Helsinki University Hospital and University of Helsinki, 00029  
12 Helsinki, Finland.

13 5. Genome Editing Core, Turku Bioscience Centre, University of Turku and Åbo Akademi  
14 University, 20520 Turku, Finland.

15 6. Department of Pathology, Turku University Hospital, 20520 Turku, Finland

16  
17 \* Author for correspondence: Pekka Taimen (pepeta@utu.fi)

18

19

20 **ABSTRACT**

21 The heat shock (HS) response is crucial for cell survival in harmful environments. Nuclear  
22 lamin A/C, encoded by *LMNA* gene, has been shown to contribute towards altered gene  
23 expression during heat shock, but the underlying mechanisms are poorly understood. Here  
24 we show that reversible lamin A/C phosphorylation at Ser22 upon HS is an evolutionary  
25 conserved stress response that is triggered in concert with HSF1 activation in human and  
26 mouse cells and can also be observed in *D. melanogaster in vivo*. Consequently, the  
27 phosphorylation increase facilitated nucleoplasmic localization of lamin A/C and nuclear  
28 rounding in response to HS. The importance of lamin phosphorylation equilibria in HS was  
29 confirmed by lamin A/C knock-out (KO) cells that showed deformed nuclei after HS and  
30 were rescued by ectopic expression of wild-type, but not by a phosphomimetic (S22D) lamin  
31 A mutant. Furthermore, HS triggered release of lamina-associated protein 2 $\alpha$  (Lap2 $\alpha$ ) from  
32 its association with lamin A/C and concurrently its downregulation, a response that was  
33 perturbed in lamin A/C KO cells and in *LMNA* mutant patient fibroblasts. The abrogated  
34 Lap2 $\alpha$  response resulted in impaired cell cycle arrest under HS and compromised survival  
35 at the recovery. Taken together, our results suggest that the altered phosphorylation  
36 stoichiometry of lamin A/C provides an evolutionary conserved mechanism to regulate lamin  
37 structure and serve nuclear adaptation and cell survival during HS.

38 **KEY WORDS:** heat shock, heat shock response, lamin A/C, phosphorylation, Lap2 $\alpha$

## 39 INTRODUCTION

40 The heat shock (HS) response is an evolutionally conserved mechanism and vital for cell  
41 survival in harmful environments or pathophysiological stresses such as high temperature,  
42 fever, or inflammation (Åkerfelt et al., 2010). Exposure to stressful conditions leads to  
43 synthesis of heat shock proteins (HSPs) that are in a key role to protect cellular homeostasis  
44 (Lindquist, 1986). The expression of HSP genes during HS is mainly controlled by heat  
45 shock factor 1 (HSF1) (Wu, 1995). Upon stress, inactive HSF1 monomers are converted to  
46 an active trimer that is hyperphosphorylated and translocated into the nucleus. Active HSF1  
47 binds to heat shock elements (HSE) at the promoter regions of HSP genes and induces  
48 transcription (Åkerfelt et al., 2010). Transcriptional response to HS results in the activation  
49 of hundreds and repression of thousands genes. HSF1 is critical for the induction of HSPs  
50 and over 200 other genes; however, the induction and repression of transcription during HS  
51 are comprehensive and the majority of these changes are HSF1-independent (Mahat et al.,  
52 2016). HSF1 DNA binding activity is detected within minutes of HS and is maintained at a  
53 high level for an hour. Thereafter, HSF1 DNA binding activity decreases to control levels,  
54 even if the cells still remain exposed to the HS (Kline & Morimoto, 1997).

55  
56 Accumulating data show that the nuclear lamina is dynamically remodeled in response to  
57 environmental cues. The ratio of A-type lamins (primarily lamin A and C) and B-type lamins  
58 (lamin B1 and B2) correlates with tissue stiffness, and the elasticity and organization of the  
59 lamina is further regulated by lamin phosphorylation/dephosphorylation status (Kochin et al.  
60 2014; Buxboim et al., 2014; Swift et al., 2013). There are a number of studies suggesting  
61 that that altered dynamics of lamins contribute to and are beneficial for cellular adaptation  
62 under HS. Early studies reported heat-induced stabilization of nucleoskeleton and  
63 dephosphorylation of lamin A/C during HS (Krachmarov & Traub, 1993). Several studies  
64 have demonstrated that lamin B1 also is upregulated upon HS (Dymlacht et al., 1999;  
65 Pradhan et al., 2020; Zhu et al., 1999) and downregulated during recovery (Haddad &  
66 Paulin-Levasseur, 2008). In *Drosophila* Schneider 2 cells, lamin Dm2 is dephosphorylated  
67 to lamin Dm1 during HS (Smith et al., 1987). Furthermore, hypersensitivity to HS has been  
68 reported in dermal fibroblasts obtained from Hutchinson-Gilford progeria (HGPS) and  
69 familial partial lipodystrophy (FPLD) patients carrying G608G and R482Q/W mutations in  
70 the lamin A/C gene (*LMNA*), respectively (Paradisi et al., 2005; Vigouroux et al., 2001).  
71 Interestingly, a recent study demonstrated that HS upregulates lamin A/C, and that lamin

72 A/C are required for heat-shock-mediated transcriptional induction of the Hsp70 genes  
73 (Pradhan et al., 2020).

74

75 As lamin A/C has been shown to contribute to the conserved HS response, we wanted to  
76 explore whether this response could be coupled to lamin A/C phosphorylation, which we  
77 have shown to be a primary determinant of lamin organization and assembly in interphase  
78 cells (Kochin et al., 2014). We show that lamin A/C is phosphorylated at serine 22 upon  
79 prolonged HS in both transformed and primary human cell lines, as well as in mouse  
80 fibroblasts, and *Drosophila melanogaster in vivo*. Lamin A/C phosphorylation leads to  
81 increased nucleoplasmic localization of lamin A/C and rounding of the nucleus in human  
82 fibroblasts. Furthermore, data from lamin A/C knock-out (KO) and mutant cells  
83 demonstrated that a balanced lamin structure is needed to avoid nuclear deformation under  
84 HS. In addition, our results reveal that lamin A/C is required during prolonged HS to regulate  
85 the functions of the nuclear lamin A/C binding partner, lamina-associated polypeptide 2  
86 alpha (Lap2 $\alpha$ ), which we show to determine cell cycle progression and cell survival during  
87 HS.

88

## 89 RESULTS

### 90 Lamin A/C is phosphorylated at serine 22 during HS

91 In an attempt to gain a better understanding of the function of nuclear lamina under heat-  
92 induced stress, we examined the expression levels, localization, and post-translational  
93 modifications of nuclear lamin A/C during HS. To this end, HeLa cells and primary human  
94 and mouse fibroblasts were exposed to HS for different periods of time (Fig. 1A). We used  
95 HSF1 gel shift as an established marker for an induced HS response (Åkerfelt et al., 2010).  
96 Intriguingly, in concert with induced HS response, we observed gradually increased  
97 phosphorylation of lamin A/C at serine 22 residue (Ser22) upon 1- to 4-hour HS at 42°C in  
98 all the cell lines (as normalized to lamin A/C and GAPDH) while phosphorylation of serine  
99 392 remained relatively stable throughout the experiments (Fig. 1A, Fig. S1). Whole *D.*  
100 *melanogaster* fruit flies heat-shocked for 30 minutes at 37°C showed similarly increased  
101 phosphorylation at Ser37, which is homologous to Ser22 in mammals (Fig. 1A). During the  
102 recovery phase, pSer22 levels were reduced along with the attenuation of the HS response  
103 as indicated with the lost gel shift of HSF1 (Fig. 1A, Fig. S1).

104

105 Additionally, we carried out a mass spectrometry (LC-MS/MS) analysis to identify any  
106 additional differently phosphorylated residues in lamin A/C. Apart from Ser22, there were  
107 five residues, Thr3, Ser5, S268, Ser398, and Thr590, that were detected in HS samples but  
108 not in control samples (Table S1). These sites correspond well to the primary interphase  
109 sites that we have previously shown to be primarily involved in regulating lamin A/C  
110 assembly and dynamics (Kochin et al., 2014). To check how the HS-mediated Ser22  
111 phosphorylation relates to the previously identified mitotically-induced Ser22  
112 phosphorylation, HeLa cells were arrested at G1/S phase with aphidicolin prior to HS. Lamin  
113 A/C was equally phosphorylated in synchronized cells upon HS confirming that  
114 phosphorylation of lamin A/C at Ser22 takes place in heat-shocked interphase cells rather  
115 than in mitotic cells (Fig. S1). In comparison, the nocodazole-arrested mitotic control cells  
116 had significantly more pSer22 lamin A/C compared to the heat-shocked cells at G1/S phase  
117 (Fig. S1). Confocal microscopy analysis with pSer22 lamin A/C antibody also showed  
118 increased nucleoplasmic labeling in non-mitotic human and mouse cells upon HS (Fig. 1B).  
119 This analysis also showed that the phosphorylation level is significantly higher in mitotic cells  
120 where all the lamin is in a disassembled nucleoplasmic state. While the HS-induced  
121 phosphorylation is at a lower level, the shift from the assembled form at the nuclear lamina  
122 to nucleoplasmic lamin is also more modest. These results indicate that lamin A/C  
123 phosphorylation at Ser22 is an evolutionary conserved HS response mechanism the onset  
124 and cessation of which occur in concert with HSF1 activation and attenuation.

125

### 126 **Phosphorylation of lamin A/C facilitates rounding of the nucleus in response to HS**

127 To study further how HS and lamin phosphorylation affects nuclear and lamina structure,  
128 primary human dermal fibroblasts from a healthy individual and from a dilated  
129 cardiomyopathy (DCM) patient carrying the p.S143P mutation in *LMNA* were analyzed upon  
130 mild 42°C (Fig. 2A) and severe 44°C HS (Fig. 2B). The baseline pSer22 status was slightly  
131 higher in the patient cells compared to controls (Fig. 2A, B;  $p < 0.05$ ). While the HS-induced  
132 increase in lamin A/C phosphorylation followed the same kinetics in both cell lines, the  
133 pSer22 levels remained consistently higher in the patient cells than in the control cells (Fig.  
134 2A), an effect that was especially conspicuous upon severe 44°C HS (Fig. 2B). Noteworthy  
135 is that the lamin A/C phosphorylation increased several fold higher in cells exposed to  
136 severe HS as compared to cells subjected to mild HS (Fig. 2A, B). Following HS at 42°C  
137 (4h) and 44°C (1h), there was a slight but statistically significant nucleoplasmic shift of lamin  
138 A/C in the control cells (Fig. 2C, D;  $p < 0.01$ ). In comparison, when patient fibroblasts were

139 examined, lamin A/C was found to be more nucleoplasmic already under normal culture  
140 conditions (Fig. 2C) corresponding to our previous observations (West et al., 2016), and the  
141 HS-induced increase in nucleoplasmic lamin A/C labeling was detected only at 44°C (Fig.  
142 2C, D;  $p < 0.05$ ). Correspondingly, lamin A/C phosphorylation intensity correlated with  
143 increased nucleoplasmic localization when analyzed from individual cells at 37°C and upon  
144 1- to 2-h HS at 44°C (Fig. 2E; Pearson correlation coefficient  $R=0.38$  for control and  $R=0.35$   
145 for patient cells,  $p < 0.01$ ).

146

147 Next, we investigated whether lamin A/C phosphorylation status correlates with HS-induced  
148 morphological nuclear changes in individual cells. Determination of nuclear area and  
149 sphericity from confocal sections of lamin A/C stained cells revealed no significant changes  
150 under mild 42°C HS (Fig. S2). However, the nuclear area decreased significantly in both cell  
151 lines under 44°C HS (Fig. 2F) and inversely correlated with nuclear rounding (sphericity)  
152 (Fig. 2G-H; Pearson correlation coefficient  $R=-0.62$  for control and  $R=-0.65$  for patients cells,  
153  $p < 0.001$ ). Equally, lamin A/C phosphorylation intensity and nuclear sphericity correlated  
154 with each other in individual heat-shocked cells (Fig. 2I; Pearson correlation coefficient  
155  $R=0.32$  for control and  $R=0.43$  for patients cells,  $p < 0.001$ ). These results confirm that  
156 phosphorylation of lamin A/C facilitates nucleoplasmic localization of lamin A/C, which then  
157 results in rounding of the nucleus in response to HS.

158

### 159 **Lamin A/C phosphorylation at Ser22 is mediated by several kinases under HS**

160 To identify potential kinase(s) responsible for lamin A/C phosphorylation during HS we  
161 tested whether aforementioned HS response could be prevented in HeLa cells when treated  
162 by different kinase inhibitors for 24 h prior to exposure to HS (Fig. 3A). In the presence of  
163 specific PKC (10  $\mu$ M Go6976) and MAPK (10  $\mu$ M U0126) inhibitors, no increase in lamin  
164 A/C phosphorylation was detected upon HS suggesting that both kinases may be involved  
165 in HS-induced lamin phosphorylation. Additionally, MAPK inhibited cells showed  
166 significantly less phosphorylation under HS compared to untreated HS cells ( $p < 0.05$ ).  
167 Similarly, the generic kinase inhibitor staurosporine (STA 200nM; inhibitor of multiple  
168 kinases, e.g. PKC, MAPK) reduced lamin phosphorylation when compared to unheated cells  
169 and heat-shocked control cells ( $p < 0.05$  and  $p < 0.01$  respectively). AKT inhibition (10  $\mu$ M  
170 API-2) decreased the phosphorylation under normal culture conditions, but lamin A/C  
171 phosphorylation was still slightly increased under HS. CDK inhibitors (100 nM flavopiridol  
172 and 1  $\mu$ M roscovitine) had no effect on lamin A/C phosphorylation under HS.

173

174 The effect of 200 nM STA on nuclear structure of control and patient fibroblasts was further  
175 analyzed after 1-h HS at 44°C. STA treatment reduced the pSer22 lamin A/C labeling  
176 intensity significantly in both cell lines although a minor phosphorylation increase was still  
177 detected under HS, especially in the patient cells (Fig. 3B, C;  $p < 0.001$ ). Interestingly, STA  
178 treatment appeared to inhibit the morphological changes previously detected in heat-  
179 shocked cells. More specifically, the area and sphericity of heat-shocked healthy control  
180 cells remained unchanged in the presence of STA while heat-shocked patient cells still  
181 showed decreased nuclear area and rounding at 2-h timepoint (Fig. S3;  $p < 0.001$ ). Similarly,  
182 an increase in heterochromatin intensity (as detected by DAPI) was inhibited by STA in  
183 healthy control cells after HS (Fig. 3D;  $p < 0.05$ ) and correlated with lamin A/C  
184 phosphorylation status (Fig. 3E;  $p < 0.001$ ). Surprisingly, similar increase or correlation was  
185 not detected in the patient cells (Fig. 3D, E). To conclude, these results suggest that several  
186 kinases are responsible, either directly or indirectly, for HS-induced lamin A/C  
187 phosphorylation. Since HS-induced increase in heterochromatin intensity is impaired in  
188 lamin mutant patient cells, these results also imply that defects in lamina structure may alter  
189 chromatin organization and global gene repression under HS.

190

### 191 **Lamin A/C knock-out cells exhibit deformed nuclear shape upon HS**

192 To further study the role of lamin A/C under HS, we created stable lamin A/C knock-out (KO)  
193 HeLa cell lines using CRISPR/Cas9 technology. Cells lentivirally transduced with two  
194 separate sgRNAs showed no detectable amounts of lamin A/C after single-cell sorting, while  
195 transduction with non-targeting (NT) sgRNA had no effect on lamin expression (Fig. 4A-C).  
196 There was no significant difference in the nuclear area between the KO, NT and non-  
197 transduced parental cells under normal culture conditions or after 4-h HS at 42°C (data not  
198 shown). However, lamin A/C KO cells showed more convoluted nuclear shape already under  
199 normal culture conditions (Fig. 4D,  $p < 0.001$ ) and these nuclear deformations became more  
200 evident upon HS whereas control cells retained their normal round shape (Fig. 4D, E;  $p <$   
201  $0.001$ ). The ectopic expression of wild-type (WT), phosphomimetic (Ser to Asp, S22D) and  
202 phosphorylation-deficient (Ser to Ala, S22A) mutant forms of GFP-labelled lamin A in LAC  
203 KO1 cells rescued symmetrical nuclear shape under normal culture conditions (Fig 4F-G;  $p$   
204  $< 0.001$ ). However, only WT-LA and S22A-LA were able to protect nuclear morphology  
205 under HS (Fig. 4G,  $p < 0.001$ ). As S22D-LA is mostly nucleoplasmic (Fig. 4F), this

206 observation indicates that intact lamina structure is needed to support nuclear shape under  
207 HS.

### 208 209 **HSF1 silencing affects lamin A but not lamin C protein level**

210 Since HSF1 is known to influence protein expression during cell stress, we further studied  
211 whether HSF1 plays any role in the regulation of lamin A/C expression. HeLa cells stably  
212 silenced for HSF1 (shHSF1) were exposed to HS for pre-determined periods of time (Fig.  
213 5A). Interestingly, we noticed an overall reduced expression of lamin A but not lamin C in  
214 shHSF1 cells suggesting that HSF1 may be involved in regulating lamin A protein level (Fig.  
215 5A; N=5;  $p < 0.05$ ;  $p < 0.01$ ). Additionally, phosphorylation of lamin A/C at Ser22 appeared  
216 delayed in the shHSF1 HeLa cells upon HS (Fig. 5A) but more detailed analysis showed that  
217 there was ~40% less pSer22 lamin A/C in shHSF1 cells already under normal conditions  
218 (as normalized to lamin A/C and HSC70) and the gradual increase in lamin A/C pSer22 level  
219 thereafter was similar to HeLa WT (Fig. 5A). Immunofluorescence analysis showed no clear  
220 difference in lamin A/C staining in shHSF1 HeLa cells compared to HeLa WT (Fig. 5B). We  
221 also analyzed whether lamin A/C KO affects HSF1 protein expression but found no  
222 significant differences in HSF1 expression level or localization in the KO cells (Fig. S4). In  
223 summary, these results suggest that HS-induced phosphorylation of lamin A/C Ser22 is not  
224 HSF1-dependent although the activation and attenuation of HSF1 is closely linked to pSer-  
225 22 onset and cessation. However, lamin A downregulation in shHSF1 cells may indicate an  
226 indirect crosstalk between lamin A and HSF1.

### 227 228 **Lap2 $\alpha$ is degraded under HS in a lamin A/C dependent manner**

229 We next asked whether lamin A/C phosphorylation affects its interaction with known binding  
230 partners. Since the phosphorylation mostly appears in the nucleoplasmic pool of lamin A/C  
231 rather than at the lamina region (Fig.1B), we decided to analyze the crosstalk between lamin  
232 A/C and its binding partner Lap2 $\alpha$ . Based on proximity ligation assay (PLA), Lap2 $\alpha$  and  
233 lamin A/C close proximity signals were reduced in HeLa cells after 4-hour HS at 42°C when  
234 compared to control cells (Fig. 6A, B;  $p < 0.001$ ). Since decreased number of PLA signals  
235 may be due to reduced proximity or downregulation of either protein, we further tested the  
236 abundance of lamin A/C and Lap2 $\alpha$  during HS. While lamin A/C protein levels remained  
237 relatively stable, there was a clear downregulation of Lap2 $\alpha$  upon HS in parental HeLa and  
238 NT HeLa cells but interestingly not in LA/C KO1 or KO2 cells (Fig. 6C, S5). All the heat-  
239 shocked cell lines showed distinct Lap2 $\alpha$  aggregates, which mostly appeared in the nuclear

240 periphery (Fig. 6D). However, the Lap2 $\alpha$  aggregates in the KO cells were approximately 300  
241 nm closer to the center of the nucleus compared to control cells suggesting that loss of lamin  
242 A/C affected their localization (Fig. S5). The HS-induced Lap2 $\alpha$  degradation was restored  
243 with ectopic expression of either WT-LA, S22D-LA, or S22A-LA into LA/C KO1 cells (Fig.  
244 6E, S6). Additionally, the localization of Lap2 $\alpha$  aggregates towards the nuclear periphery  
245 was rescued with all the plasmids (Fig. S6).

246  
247 Since HS-induced Lap2 $\alpha$  downregulation could be due to reduced protein synthesis or  
248 degradation of the protein, we next exposed HeLa cells to HS in the presence of 10  $\mu$ M  
249 cycloheximide (CHX, an inhibitor of protein synthesis), 10  $\mu$ M epoximycin (EPO, a  
250 proteasomal inhibitor), and/or 10  $\mu$ M chloroquine (CQ, an inhibitor of autophagy) (Fig. 6E).  
251 Surprisingly, Lap2 $\alpha$  was not downregulated or aggregated in heat-shocked cells under CHX  
252 treatment. Since CHX inhibits all protein synthesis, it is possible that proteins required for  
253 Lap2 $\alpha$  degradation were not produced. This also points out that Lap2 $\alpha$  downregulation is  
254 due to degradation of the protein rather than inhibition of protein synthesis. Lap2 $\alpha$  was  
255 equally downregulated upon HS in the presence of EPO or CQ. However, in the presence  
256 of both EPO and CQ, Lap2 $\alpha$  protein level remained stable. These results suggest that under  
257 prolonged HS, Lap2 $\alpha$  is degraded possibly through both proteasomes and autophagy, and  
258 the degradation is impaired in lamin A/C KO cells.

259

### 260 **Dermal patient fibroblasts with a *LMNA* mutation are more sensitive to HS**

261 To study whether aforementioned changes in Lap2 $\alpha$  take place also in normal diploid cells,  
262 control and patient fibroblasts with p.S143P *LMNA* mutation were tested. Similar to HeLa  
263 cells, Lap2 $\alpha$  was downregulated in heat-shocked control fibroblasts (Fig. 7A;  $p < 0.05$ ).  
264 However, in the patient cells Lap2 $\alpha$  downregulation was delayed and evident only after 4 h  
265 HS and at the recovery (Fig. 7A;  $p < 0.05$ ). Further analysis revealed that Lap2 $\alpha$  was  
266 downregulated in parallel with reduced proliferation marker Ki-67 expression (Fig. 7B,C, S7).  
267 In the control cells, the number of Ki-67 positive cells decreased from original 35% to 7%  
268 during 4-hour HS while in the patient cells a significantly smaller reduction from 41% to 28%  
269 was observed (Fig. 7C;  $p < 0.001$  and  $p < 0.05$ , respectively). Correspondingly, there was  
270 significantly more mitotic cells among patient cells compared to controls during HS (Fig. 7D,  
271  $p < 0.05$ ). These results suggest that HS-induced cell cycle arrest to G0 is impaired in lamin  
272 A/C mutant cells. Additionally, there was significantly more cleaved poly (ADP-ribose)  
273 polymerase-1 (PARP-1) in the patient cells throughout the experiment, potentially indicating



274 caspase activity and increased DNA damage in these cells (Fig. 7A). Cell viability was further  
275 analyzed with a cell count assay. HS at 42°C did not affect the viability of either cell line (Fig.  
276 S7). However, HS at 44°C reduced the survival of patient cells (presumably due to increased  
277 cell death) within the first 48 hours of recovery (Fig. 7E;  $p < 0.05$ ). Both the cell lines  
278 eventually recovered from the HS and started to proliferate after 96 h. Altogether, these  
279 results suggest that patient cells have decreased capacity to undergo cell cycle arrest which  
280 may eventually lead to reduced cell survival at the recovery.

281

## 282 **DISCUSSION**

283 In the current study, we describe a previously unreported and evolutionary conserved post-  
284 translational modification of the lamin A/C amino-terminal head upon HS. Lamin A/C was  
285 gradually phosphorylated at Ser22 in both normal diploid and transformed human and  
286 mouse cell lines, as well as in *D. melanogaster* flies *in vivo*. Consequently, the  
287 phosphorylated pool of lamin A/C relocated into nucleoplasm and the adapted nuclei  
288 became more spherical especially under severe HS. On the other hand, lamin A/C KO and  
289 mutant cells were more vulnerable to HS indicating that normal filamentous lamina, formed  
290 by unphosphorylated lamins, is equally important for nuclear shape maintenance and for  
291 regulation of cell cycle through Lap2 $\alpha$  in heat-shocked cells. All these results suggest that  
292 the nuclear lamina is dynamically modified under HS to preserve cell homeostasis.

293

### 294 **The effects of HS-induced phosphorylation on lamin A/C**

295 In early studies, Krachmarov & Traub (1993) reported heat-induced stabilization of  
296 nucleoskeleton and dephosphorylation of lamin A/C in Ehrlich Ascites tumor cells after HS.  
297 Additionally, Smith et al. (1987) reported that in *Drosophila* Schneider 2 cells lamin Dm2 is  
298 dephosphorylated to lamin Dm1 under HS. In contrast to these studies on the overall  
299 phosphorylation state, we focused on specific lamin A/C phospho-epitopes and our results  
300 are thus not necessarily in contradiction with the previous observations (although we found  
301 no clear evidence for general dephosphorylation of lamin A/C upon HS in LC-MS/MS  
302 analysis).

303

304 Ser22 is a canonical mitotic phosphorylation site but accumulating data shows that Ser22 is  
305 also phosphorylated in interphase cells upon low mechanical stress and on soft matrices  
306 leading to increased elasticity of the nuclear lamina and improved cellular adaption (Bainer  
307 & Weaver, 2013; Buxboim et al., 2014). Our results are in line with the literature as we

308 demonstrated that lamin A/C phosphorylation increases the nucleoplasmic localization of  
309 lamin A/C and simultaneous rounding off a nucleus in response to HS (Fig. 2C-I). Hence,  
310 the pSer22 response causes a partial change in phosphorylation stoichiometry, which is not  
311 sufficient to induce full disassembly but rather a partial shift from the assembled to the  
312 nucleoplasmic lamin pool, which is likely to serve the regulation of nuclear structure and  
313 properties to facilitate nuclear adaptation during the ongoing stressful conditions.

314  
315 The nuclear rounding during HS is presumably a consequence of cell shrinking. Gungor et  
316 al. (2014) reported a drastic reduction of F-actin expression and cell rounding/shrinking in  
317 response to severe heat treatment (43°C). The resulting reduced cytoskeletal tension also  
318 decreases tension on the nucleus and facilitates its rounding through lamin A/C  
319 phosphorylation (Buxboim et al., 2014). In accordance with the assumption that nuclear  
320 rounding is due to phosphorylation-mediated effects, we found that nuclear rounding of  
321 fibroblast was prevented when lamin A/C phosphorylation was inhibited (Fig. 2, S3).

322  
323 More recently, it was reported that in interphase cells pSer22 lamin A/C may act as a  
324 transcriptional activator by binding gene enhancer domains in the nuclear interior, and some  
325 of the binding sites were altered in dermal fibroblasts obtained from HGPS patients (Ikegami  
326 et al., 2020). Transcriptional response to HS results in the repression of thousands of genes  
327 (Mahat et al., 2016) and this is likely to explain the increased intensity of heterochromatin  
328 detected in healthy fibroblasts during HS (Fig. 3D). The enhanced heterochromatin intensity  
329 also correlated with pSer22 lamin A/C status (Fig. 3E). However, we did not observe a  
330 similar heterochromatin increase in the patient cells (Fig. 3E). Considering the findings  
331 reported by Ikegami et al. (2020) it is tempting to speculate that phosphorylated lamin A/C  
332 contributes to HS-induced gene expression, similar to HSF1, and further studies on these  
333 mechanisms are warranted.

334  
335 We also noticed that lamin A/C was constantly more phosphorylated at Ser22 in the patient  
336 fibroblasts compared to control cells. Since p.S143P mutant lamin A/C is incapable of  
337 forming normal filaments and primarily nucleoplasmic (West et al., 2016), it may be more  
338 accessible by kinase for phosphorylation in these cells (Fig. 2A, B). As Ser22  
339 phosphorylation is known to increase the mobility of lamin A (Kochin et al., 2014), the  
340 increased phosphorylation of lamin A/C may further reduce the stability of lamina in the  
341 patient cells.

342

### 343 **Multiple kinases may phosphorylate lamin A/C under HS**

344 To determine the kinases responsible for the HS-induced phosphorylation of lamin A/C  
345 Ser22, we inhibited several different kinases that have previously been shown to  
346 phosphorylate lamin A/C (reviewed by Liu and Ikegami, 2020). Both MAPK and PKC  
347 inhibitors partially abolished lamin A/C phosphorylation, while the pan-inhibitor (STA) had  
348 the most significant effect suggesting that several kinases may be involved. Our results are  
349 consistent with previous screening studies showing that lamin A/C are ERK2 substrates  
350 (Carlson et al., 2011). There is also evidence that lamin A is phosphorylated at Ser268 by  
351 PKC to regulate nuclear size (Edens et al., 2017). Interestingly, we also detected the  
352 phosphorylation of Ser268 in LC-MS/MS analysis after 2- and 4-h HS but not in control cells  
353 (Table 1S). Therefore, it is possible that phosphorylation of lamin A/C at Ser268 contributes  
354 to modulation of nuclear size upon HS. Since at least 25 residues in lamin A/C are known  
355 to be phosphorylated during interphase and the degree of phosphorylation at each site may  
356 vary (Liu & Ikegami, 2020), one still needs to be cautious when estimating the biological  
357 effect of a single residue phosphorylation.

358

### 359 **The effects of Lap2 $\alpha$ degradation on cell survival upon HS**

360 Our results also revealed that Lap2 $\alpha$  is degraded under HS and the degradation is impaired  
361 in lamin A/C KO cells (Fig. 6C, S5). Transfections with WT-LA, S22D-LA, and S22A-LA  
362 restored the degradation of Lap2 $\alpha$  (Fig. 6E), which suggest that Lap2 $\alpha$  is degraded in lamin  
363 A/C dependent manner, but is independent of lamin A/C Ser22 phosphorylation status. A  
364 similar downregulation was detected in primary human skin fibroblasts derived from a  
365 healthy control and a DCM patient, carrying the p.S143P *LMNA* mutation (Fig. 7A). We also  
366 noticed that Lap2 $\alpha$  is degraded simultaneously with Ki-67 in control fibroblasts under severe  
367 HS but such degradation appeared delayed in the *LMNA* mutant patient fibroblasts (Fig. 7B-  
368 C). Previous data has shown that Lap2 $\alpha$  is required for cell proliferation and is degraded  
369 upon cell cycle arrest in normal human fibroblasts (Pekovic et al., 2007). Based on these  
370 results, we conclude that lamin mutant fibroblasts have decreased capacity to undergo cell  
371 cycle arrest to G0 under HS. Similar results have been reported in *Lmna*<sup>-/-</sup> MEFs, that  
372 showed diminished cell cycle arrest in response to  $\gamma$  irradiation-induced DNA damage  
373 (Johnson et al., 2004). Continued cell cycle under stressful conditions typically leads to  
374 accumulating DNA damage and eventually cell death through apoptosis. Accordingly,  
375 PARP-1 was increasingly cleaved in lamin mutant patient cells under 44°C HS and the cells

376 showed reduced survival at the recovery when compared to control cells (Fig. 7E). In  
377 support, hypersensitivity to HS has previously been reported in dermal fibroblasts obtained  
378 HGPS patients carrying the G608G mutation in *LMNA* gene. These cells showed  
379 dysmorphic nuclei and delayed recovery after 30 min HS at 45°C (Paradisi et al., 2005).  
380 Extensive nuclear deformations were also detected in heat-shocked dermal fibroblasts from  
381 FPLD patients carrying the R482Q mutation in *LMNA* gene (Vigouroux et al., 2001).  
382 Altogether these results indicate that in heat-shocked cells, where the lamina is rapidly  
383 remodeled through phosphorylation, the disease-linked mutations in lamin A/C cause  
384 nuclear instability and may sensitize cells to cell death.

385

386 In conclusion, we discovered a previously unknown and evolutionary conserved mechanism  
387 that regulates lamin A/C dynamics in heat-shocked cells. The degree of lamin A/C Ser22  
388 phosphorylation appears tightly regulated and correlates with duration and severity of HS  
389 suggesting that the ratio of phosphorylated and unphosphorylated lamin A/C is critical for  
390 maintenance of proper lamina elasticity/stiffness, depending on prevailing circumstances.  
391 Our results also show that HS-induced modifications in the lamina are very similar to those  
392 induced by mechanical cues, such as matrix elasticity (Buxboim et al., 2014), and it seem  
393 plausible that Ser22 phosphorylation is a consequence of cell shrinking and nuclear  
394 rounding observed in heat-shocked cells. Which kinase is responsible for Ser22  
395 phosphorylation and whether pSer22-lamin A/C also plays a role in HS-induced gene  
396 expression remains to be elucidated in follow-up studies.

397

398

399

400

401

402

403

404

405

406

407

408

409

## 410 **MATERIALS AND METHODS**

411

### 412 **Cell lines, cell culture and transfections**

413 HeLa cervical carcinoma cells were grown under a humidified 5% CO<sub>2</sub> atmosphere at 37°C  
414 in Dulbecco's modified Eagle's medium (DMEM, Lonza, Alpharetta, GA, USA)  
415 supplemented with 10% fetal bovine serum (Thermo Fisher Scientific, Waltham, MA, USA)  
416 and penicillin/streptomycin/glutamine (Thermo Fisher Scientific). HSF1 silenced HeLa cells  
417 (ShHSF1) were kindly provided by Professor Lea Sistonen (Åbo Akademi University, Turku,  
418 Finland). Primary human and mouse fibroblasts were cultured in Minimum Essential Media  
419 (MEM, Thermo Fisher Scientific) supplemented with 15% FBS, antibiotics (penicillin,  
420 streptomycin), and 5% Non-Essential Amino Acids (Thermo Fisher Scientific). The use of  
421 patient fibroblasts was approved by the Ethics Committees of the Hospital District of Helsinki  
422 and Uusimaa (HUS 387/13/03/2009 and HUS/1187/2019). All procedures were undertaken  
423 with informed consent and according to the principles expressed in the Declaration of  
424 Helsinki.

425

426 HeLa cells and mouse fibroblasts were heat shocked under a humidified 5% CO<sub>2</sub>  
427 atmosphere at 42°C for 1, 2, or 4 h and left to recover at 37°C for 3 or 24 h after 2-h HS.  
428 Human fibroblasts were heat shocked either at 42°C or 44°C. For cell cycle synchronization  
429 10 µg/ml aphidicolin (Sigma-Aldrich, Saint Louis, MO, USA) was used 24 h prior to HS. For  
430 kinase inhibition 100 nM flavopiridol (Selleckhem, Houston, TX, USA), 1 µM roscovitine  
431 (Selleckhem), 10 µM U0126 (Selleckhem), 10 µM Go6976 (Selleckhem), 10 µM triciribine  
432 (API-2, Selleckhem), or 200nM staurosporine (STA, Selleckhem) was used 24 h prior to  
433 exposure to HS. For degradation analysis we exposed HeLa cells to HS in the presence of  
434 10 µM cycloheximide (CHX, Sigma-Aldrich), 10 µM epoximycin (EPO, Sigma-Aldrich), and  
435 10 µM chloroquine (CQ, Sigma-Aldrich). For control cells, equal concentrations of solvent  
436 (DMSO) was added into culture media.

437

438 Lamin A/C KO HeLa cells were transfected with Trans-IT HelaMONSTER (MirusBio,  
439 Madison, WI, USA) according to the manufacturer's protocol and used for experiments 48 h  
440 after the transfection. Plasmids encoding either wild-type EGFP-tagged lamin A (pEGFP-  
441 C1-LA), phosphomimetic (pEGFP-C1-LA-S22D), or phospho-deficient (pEGFP-C1-LA-  
442 S22A) mutant forms of lamin A were cloned as described elsewhere (Kochin et al., 2014).

443 Human fibroblast count was determined after 2-h HS (44°C) at 0, 24, 48, and 96-h time  
444 points. Attached cells were trypsinized at each time point, collected and counted with cell  
445 counting slides (BioRad, Hercules, CA, USA).

446

#### 447 **CRISPR/Cas9 *LMNA* KO HeLa**

448 Lamin A/C knock-out (KO) HeLa cells were established with CRISPR/Cas9 technology at  
449 Turku Bioscience Genome Editing Core. A two-component CRISPR system was used to  
450 generate *LMNA* KO cells (Adli, 2018). *LMNA* sgRNAs (seq#1-  
451 CCAGAAGAACATCTACAGTG, seq#2-TGAAGAGGTGGTCAGCCGCG, seq#3-  
452 ATGCCAGGCAGTCTGCTGAG were selected using DeskGEN platform and cloned  
453 according to Feng Zhang lab protocol. Both *LMNA* sgRNA#1 and #2 generated full KO  
454 clones.

455

456 Separate lentivectors containing spCas9 (lentiCas9-Blast a gift from Feng Zhang (Addgene  
457 plasmid # 52962) and sgRNA (lentiGuide-Puro a gift from Feng Zhang (Addgene plasmid #  
458 52963) were produced in 293FT packaging cell line by transient cotransfection. Shortly, 40-  
459 70% confluent HEK 293FT cells were used for transfections with 14 µg of transfer vector, 4  
460 µg of packaging vector psPAX2 (gift from Didier Trono (Addgene plasmid # 12260)), 2 µg  
461 envelope vector pMD2.G (gift from Didier Trono (Addgene plasmid # 12259)) mixed in 0.45  
462 mL water, 2.5M CaCl<sub>2</sub>, and 2x HeBS (274 mM NaCl, 10 mM KCl, 1.4 mM Na<sub>2</sub>HPO<sub>4</sub>, 15  
463 mM D-glucose, 42 mM Hepes, pH 7.06) per 10 cm dish. Before adding to the cells, the DNA-  
464 HeBS mix was incubated for 30 min at RT. After overnight incubation medium with DNA  
465 precipitate was gently removed from the cells and replaced with a full fresh medium. Media  
466 containing viral particles was collected after 72 h, spun at 300 rpm for 5 min at RT to remove  
467 cell debris, filtered through 0.45 µm PES filter, and concentrated by ultracentrifugation for 2  
468 h at 25,000 rpm, 4°C (Beckman Coulter). The pellet containing lentiviral particles was  
469 suspended in the residual medium, incubated for ~2 h in +4°C with occasional mild vortex,  
470 aliquoted, snap-frozen and stored in -70°C. P24 ELISA measured physical lentiviral titer with  
471 a serial dilution of virus stock according to manufacturer protocol.

472

473 To generate *LMNA*<sup>-/-</sup> clones in HeLa cells, 1e+05 cells were seeded on a 24-well plate. The  
474 next day the cells were transduced with Lenti-Cas9 (MOI 1, 3, 6), and 72 hours later, 8  
475 µg/mL of Blasticidin was applied to select Cas9 expressing cells. Cells transduced with the  
476 smallest amount of Lenti-Cas9 particles that survived after the control well were proceeded

477 to the next step. In the second stage, the mixed pool of stably expressing Cas9 cells was  
478 transduced with Lenti sgRNA vectors (MOI 6,9, 12), and 72 hours later, 1 µg/ul Puromycin  
479 was applied on cells to select double-positive Cas9+/Lenti sgRNA+ cells. Based on Western  
480 blot results, cell populations showing the highest reduction in lamin A/C protein levels were  
481 single sorted (Sony SH800 cell sorter, Sony Biotechnology Inc) and re-grown into a clonal  
482 cell population. On average, about 20 clones per sgRNA population were screened with  
483 Western blotting and Sanger sequencing to confirm full knockout status.

#### 484 485 ***Drosophila melanogaster* husbandry, treatments and analysis**

486 Canton-S wild type flies were a gift from Dr. Pascal Meier, Institute of Cancer Research,  
487 London UK. Flies were maintained in vials at 22°C on a 12-hour light/dark cycle on Nutri-Fly  
488 cornmeal medium (Nutri-fly BF, Dutscher Scientific, France). Adult flies were used in the  
489 experiments. HS was induced in the flies by incubating the vials (20-30 flies per vial) at 37°C  
490 for 30 min, followed by 3- or 7-h recovery periods at 22°C. Ten flies per sample were kept  
491 at -20°C for 5 min to euthanize the flies. Using an electronic pestle, the flies were  
492 homogenized in lysis buffer (50 mM Tris [pH 7.5], 150 mM NaCl, 1% Triton X-100, 1 mM  
493 EDTA, 10% glycerol) with 1x protease and phosphatase inhibitors (Thermo Scientific). The  
494 lysates were kept on ice for 10 min. To remove exoskeleton and fat from the lysates, the  
495 samples were centrifuged for 10 min at 12000 rpm at 4°C. The clear supernatant was  
496 transferred into new microtubes, avoiding the debris at the bottom and the fat layer on the  
497 top. The lysate was cleared by centrifuging again for 10 min at 12000 rpm at 4°C. The clear  
498 supernatant was transferred into new microtubes and mixed with 4x Laemmli-β-  
499 mercaptoethanol to a concentration of 1x. Samples were incubated at 95°C for 10 min and  
500 separated on 10% SDS-PAGE gel and transferred to a nitrocellulose membrane. *Drosophila*  
501 lamin C and phosphorylated lamin C were detected with mouse anti-lamin C antibody  
502 (1:1000, LC28.26, DSHB, Iowa City, IA, USA) and rabbit monoclonal phospho-lamin A/C  
503 (Ser22) (1:1000, D2B2E, Cell Signaling Technology, Danvers, MA, USA), respectively. Actin  
504 was used as a loading control and was detected with goat polyclonal actin antibody (1:2000,  
505 C11, sc-1615, Santa Cruz Biotechnology, Dallas, TX, USA). The secondary antibodies were  
506 goat anti-mouse IgG-HRP (sc-2005), goat anti-rabbit IgG-HRP (sc-2004) and donkey anti-  
507 goat IgG-HRP (sc-2020) (all from Santa Cruz Biotechnology) at 1:5000. The ECL advanced  
508 Western blotting detection kit (RPN 3243, Sigma Aldrich) was used for signal detection.

#### 509 510 **Immunoblotting**

511 Unheated and heated samples were lysed in mammalian protein extraction reagent (M-PER,  
512 Thermo Fisher Scientific) complemented with 1x protease and 1x phosphatase inhibitors  
513 (Thermo Fisher Scientific). Cell lysates were mixed with 4x Laemmli sample buffer and run  
514 on a 4–20% gradient gel (BioRad) and transferred to nitrocellulose filter (BioRad). The  
515 primary antibodies used were mouse monoclonal lamin A/C (1:10,000, 5G4, kindly provided  
516 by Prof. Robert D. Goldman, Northwestern University, USA), rabbit polyclonal heat shock  
517 factor 1 (1:1000, ADI-SPA-901, Enzo Life Science, Farmingdale, NY, USA), rat monoclonal  
518 heat shock factor 1 (1:1000, 10H8, Stress Marq Bioscience inc., Victoria, Canada), rabbit  
519 monoclonal phospho-lamin A/C serine 22 (1:1000, D2B2E, Cell Signaling Technology),  
520 rabbit polyclonal phospho-lamin A/C serine 392 (1:1000, ab58528, Abcam), rabbit polyclonal  
521 AKT (pan) (1:1000, C67E7, Cell Signaling Technologies), rabbit monoclonal pAKT T303  
522 (1:1000, D6F8, Cell Signaling Technologies), rabbit polyclonal ERK1 (1:500; K-23, Santa  
523 Cruz Biotechnology), rabbit polyclonal ERK2 (1:500, c-14, Santa Cruz Biotechnology), rabbit  
524 monoclonal pERK1/2 (1:1000, D13.14.4E, Cell Signaling Technologies), rabbit monoclonal  
525 cleaved PARP-1 (1:1000, E-51, Abcam, Cambridge, UK), rabbit monoclonal Caspase-3  
526 (1:1000, 8G10, Cell Signaling), rabbit monoclonal cleaved caspase-3 (1:1000, Asp175, Cell  
527 Signaling), rabbit monoclonal Lap2 $\alpha$  (1:5000, 245/2, kindly provided by Prof. Roland  
528 Foisner, University of Vienna), HSP70/HSP72 mouse monoclonal (1:1000, C92F3A-5, Enzo  
529 life sciences), HSC70/HSP73 rat monoclonal (1:1000, 1B5, Enzo life sciences), HRP-  
530 conjugated anti-GAPDH (1:5000, ab9385, Abcam) and mouse monoclonal anti-actin  
531 (1:1000, AC-40, Sigma-Aldrich). Secondary antibodies were HRP-conjugated donkey anti-  
532 rabbit-IgG, sheep anti-mouse-IgG and anti-rat-IgG (all from GE Healthcare, Chicago, IL,  
533 USA). The antibodies were detected with Enhanced Chemiluminescence kit (Thermo  
534 Fischer Scientific).

535

### 536 **Immunofluorescence and Microscopy**

537 Cells grown on coverslips were fixed in 10% formalin for 10 min, permeabilized with 0.1%  
538 Triton X-100 for 10 min and blocked with 1% BSA in TBST for 30 min. The primary antibodies  
539 used were mouse monoclonal lamin A/C (1:10000, 5G4, kindly provided by prof. Robert D.  
540 Goldman, Northwestern University, USA), mouse monoclonal lamin A/C (1:100, 4C11, Cell  
541 Signaling Technologies), rabbit monoclonal phospho-lamin A/C serine 22 (1:400, D2B2E,  
542 Cell Signaling), rabbit polyclonal HSF1 (1:400, ADI-SPA-901, Enzo), rat monoclonal HSF1  
543 (1:400, 10H8, StressMarq Bioscience Inc.), rabbit monoclonal Lap2 $\alpha$  (1:1000, 245/2, kindly  
544 provided by Prof. Roland Foisner, University of Vienna), and mouse monoclonal Ki-67



545 (1:200, MIB-1, DAKO, Denmark). The secondary antibodies were donkey anti-rabbit IgG  
546 conjugated to Alexa Fluor 488, donkey anti-mouse IgG conjugated to Alexa Fluor 555, and  
547 chicken anti-rat IgG conjugated to Alexa Fluor 647 (all Molecular Probes, 1:200, Eugene,  
548 OR, USA). ProLong Diamond Antifade Mountant with DAPI was used to visualize DNA  
549 (Thermo Fisher Scientific). Dualink proximity ligation assay (PLA) was conducted according  
550 to the manufacturer's protocol (Sigma-Aldrich).

551  
552 The spinning disk confocal microscope used was a 3i Marianas with Yokogawa CSU-W1  
553 scanning unit on an inverted Zeiss AxioObserver Z1 microscope, controlled by SlideBook 6  
554 software (Intelligent Imaging Innovations GmbH, Göttingen, Germany). The objective used  
555 was 63x/1.4 oil. Images were acquired with ORCA Flash4 sCMOS camera (Hamamatsu  
556 Photonics, Hamamatsu, Japan). All the images were analyzed with ImageJ Fiji software  
557 (Schindelin et al., 2012). Confocal maximum projection images were used to analyze the  
558 quantity of PLA signals. Lap2 $\alpha$  aggregate quantity and localization were analyzed from 3D  
559 confocal stacks using imageJ plugin NucleusJ (Poulet et al., 2015). Fluorescence intensities  
560 of lamin A/C within the lamina (L) and nucleoplasmic (N) regions were quantified and the  
561 ratio of fluorescence between the lamina and nucleoplasma were calculated as follows:

562  
563 
$$\textit{intensity ratio} = \frac{N-B}{L-B}$$

564  
565 , where B is background.

566  
567 The shHSF1 samples were imaged using a Zeiss LSM880 confocal microscope with  
568 Airyscan mode. Images were taken using a 63x Zeiss C plan-Apochromat oil immersion  
569 objective (NA = 1.4) with an additional 1.8x zoom. Following imaging, the raw data was  
570 processed using the Airyscan processing module in the Zen blue software (Jena, Germany).  
571 Minor image quality adjustments were done using the ImageJ FIJI software.

572  
573 **Phosphorylation analysis by mass spectrometry**

574 Lamin A/C was immunoprecipitated from G1/S phase synchronized control and heat  
575 shocked (2 and 4 h at 42°C) HeLa cells and run on gel. Mass spectrometry analysis was  
576 performed at the Turku Proteomics Facility, University of Turku and Åbo Akademi University  
577 with the following protocol: Lamin A/C immunoprecipitate was in-gel digested using trypsin.

578 Phosphopeptides were enriched by Thermo's High-Select TiO<sub>2</sub> Phosphopeptide  
579 Enrichment Kit according manufacturer's protocol. The LC-ESI-MS/MS analyses were  
580 performed on a nanoflow HPLC system (Easy-nLC1200, Thermo Fisher Scientific) coupled  
581 to the Q Exactive HF mass spectrometer (Thermo Fisher Scientific, Bremen, Germany)  
582 equipped with a nano-electrospray ionization source. MS data was acquired automatically  
583 by using Thermo Xcalibur 3.1 software (Thermo Fisher Scientific). Data files were searched  
584 for protein identification using Proteome Discoverer 2.3 software (Thermo Fisher Scientific)  
585 connected to an in-house server running the Mascot 2.6.1 software (Matrix Science). Data  
586 was searched against a SwissProt database containing human protein sequences.

587

### 588 **Statistical analysis**

589 Each experiment was repeated at least two times from samples that were prepared  
590 independently of each other. The results are presented as average values  $\pm$  SEM. The  
591 statistical analyses were performed using Graphpad Prism 8, Microsoft Excel or R software.  
592 Datasets that followed normal distribution were analyzed with Student's t-test or grouped  
593 two-way ANOVA followed by Tukey post-test. Pearson correlation coefficient was used to  
594 quantifie the relationship between two variables. Non-parametric datasets were analyzed  
595 with Mann-Whitney test. P-values  $\leq 0.05$  were considered statistically significant and are  
596 marked with symbols in the figures. The exact sample sizes and number of measurements  
597 for each experiment is indicated in the figure texts.

598

### 599 **Acknowledgments**

600 Jenny Joutsen is thanked for her advice and support on HS experiment, Robert D. Goldman  
601 for kindly providing the lamin antibodies, Lea Sistonen for shHSF1 cell line, and Roland  
602 Foisner for lap2 $\alpha$  antibody. Cell Imaging Core (Turku Centre for Biotechnology) is  
603 acknowledged for help with confocal microscopy and AFM, Turku Proteomics Facility for the  
604 mass spectrometry, and Turku Bioscience Genome Editing Core for CRISPER/Cas9 lamin  
605 A/C KO cell lines. We also thank the patients for donating their biopsies for research.

606

### 607 **Competing interests**

608 The authors declare no competing or financial interests.

609

### 610 **Author contributions**

611 L.V., E.H., J.E., A.M. and P.T. designed and performed research, and wrote the manuscript.  
612 J.G., M.H., J.I., G.W, A.P. and F.L. performed experiments. T.H. recruited patients and  
613 provided material. All co-authors approved the final version of the manuscript.

614

## 615 **Funding**

616 This project was supported by grants received from the Academy of Finland (P.T.), the Sigrid  
617 Jusélius Foundation (P.T.), the Finnish Foundation for Cardiovascular Research (P.T., L.V.).  
618 L.V. was supported by the Turku Doctoral Programme of Molecular Medicine and grants  
619 from the Finnish Cultural Foundation, the University of Turku and Otto A. Malm foundation.

## **References**

- Adli, M.** (2018). The CRISPR tool kit for genome editing and beyond. *Nature Communications*, **9**, 1911.
- Åkerfelt, M., Morimoto, R. I., & Sistonen, L.** (2010). Heat shock factors: Integrators of cell stress, development and lifespan. *Nature Reviews Molecular Cell Biology*, **11**, 545–555.
- Bainer, R., & Weaver, V.** (2013). Strength under tension. *Science*, **341**, 965–966.
- Buxboim, A., Swift, J., Irianto, J., Spinler, K. R., Dingal, P. C. D. P., Athirasala, A., Kao, Y. R. C., Cho, S., Harada, T., Shin, J. W., & Discher, D. E.** (2014). Matrix elasticity regulates lamin-A,C phosphorylation and turnover with feedback to actomyosin. *Current Biology*, **24**, 1909–1917.
- Carlson, S. M., Chouinard, C. R., Labadorf, A., Lam, C. J., Schmelzle, K., Fraenkel, E., & White, F. M.** (2011). Large-scale discovery of ERK2 substrates identifies ERK-mediated transcriptional regulation by ETV3. *Science Signaling*, **4**, rs11.
- Dynlacht, J. R., Story, M. D., Zhu, W. G., & Danner, J.** (1999). Lamin B is a prompt heat shock protein. In *Journal of Cellular Physiology*, **178**, 28-34.
- Edens, L. J., Dilsaver, M. R., & Levy, D. L.** (2017). PKC-mediated phosphorylation of nuclear lamins at a single serine residue regulates interphase nuclear size in Xenopus and mammalian cells. *Molecular Biology of the Cell*, **28**, 1389–1399.
- Gungor, B., Gombos, I., Crul, T., Ayaydin, F., Szabó, L., Török, Z., Mátés, L., Vígh, L., & Horváth, I.** (2014). Rac1 participates in thermally induced alterations of the cytoskeleton, cell morphology and lipid rafts, and regulates the expression of heat shock proteins in B16F10 melanoma cells. *PLoS ONE*, **9**, e89136.
- Haddad, N., & Paulin-Levasseur, M.** (2008). Effects of heat shock on the distribution and

expression levels of nuclear proteins in HeLa S3 cells. *Journal of Cellular Biochemistry*, **105**, 1485–1500.

- Ikegami, K., Secchia, S., Almakki, O., Lieb, J. D., & Moskowitz, I. P.** (2020). Phosphorylated Lamin A/C in the Nuclear Interior Binds Active Enhancers Associated with Abnormal Transcription in Progeria. *Developmental Cell*, **52**, 699-713.e11.
- Johnson, B. R., Nitta, R. T., Frock, R. L., Mounkes, L., Barbie, D. A., Stewart, C. L., Harlow, E., & Kennedy, B. K.** (2004). A-type lamins regulate retinoblastoma protein function by promoting subnuclear localization and preventing proteasomal degradation. *Proceedings of the National Academy of Sciences of the United States of America*, **101**, 9677–9682.
- Kline, M. P., & Morimoto, R. I.** (1997). Repression of the heat shock factor 1 transcriptional activation domain is modulated by constitutive phosphorylation. *Molecular and Cellular Biology*, **17**, 2107-2115.
- Kochin, V., Shimi, T., Torvaldson, E., Adam, S. A., Goldman, A., Pack, C. G., Melo-Cardenas, J., Imanishi, S. Y., Goldman, R. D., & Eriksson, J. E.** (2014). Interphase phosphorylation of lamin A. *Journal of Cell Science*, **127**, 2683–2696.
- Krachmarov, C. P., & Traub, P.** (1993). Heat-induced morphological and biochemical changes in the nuclear lamina from Ehrlich ascites tumor cells in vivo. *Journal of Cellular Biochemistry*, **52**, 308–319.
- Lindquist, S.** (1986). The Heat-Shock response. *Annual Review of Biochemistry*, **55**, 115-91.
- Liu, S. Y., & Ikegami, K.** (2020). Nuclear lamin phosphorylation: an emerging role in gene regulation and pathogenesis of laminopathies. *Nucleus*, **11**, 299–314.
- Mahat, D. B., Salamanca, H. H., Duarte, F. M., Danko, C. G., & Lis, J. T.** (2016). Mammalian Heat Shock Response and Mechanisms Underlying Its Genome-wide Transcriptional Regulation. *Molecular Cell*, **62**, 63–78.
- Paradisi, M., McClintock, D., Boguslavsky, R. L., Pedicelli, C., Worman, H. J., & Djabali, K.** (2005). Dermal fibroblasts in Hutchinson-Gilford progeria syndrome with the lamin A G608G mutation have dysmorphic nuclei and are hypersensitive to heat stress. *BMC Cell Biology*, **6**, 1–11.
- Pekovic, V., Harborth, J., Broers, J. L. V., Ramaekers, F. C. S., Van Engelen, B., Lammens, M., Von Zglinicki, T., Foisner, R., Hutchison, C., & Markiewicz, E.** (2007). Nucleoplasmic LAP2 $\alpha$ -lamin A complexes are required to maintain a proliferative state in human fibroblasts. *Journal of Cell Biology*, **176**, 163–172.

- Poulet, A., Arganda-Carreras, I., Legland, D., Probst, A. V., Andrey, P., & Tatout, C.** (2015). NucleusJ: An ImageJ plugin for quantifying 3D images of interphase nuclei. *Bioinformatics*, **31**, 1144–1146.
- Pradhan, R., Nallappa, M. J., & Sengupta, K.** (2020). Lamin A/C modulates spatial organization and function of the Hsp70 gene locus via nuclear myosin I. *Journal of Cell Science* **133**, jcs236265.
- Schindelin, J., Arganda-Carreras, I., Frise, E., Kaynig, V., Longair, M., Pietzsch, T., Preibisch, S., Rueden, C., Saalfeld, S., Schmid, B., Tinevez, J. Y., White, D. J., Hartenstein, V., Eliceiri, K., Tomancak, P., & Cardona, A.** (2012). Fiji: An open-source platform for biological-image analysis. *Nature Methods*, **9**, 676–682.
- Smith, D. E., Gruenbaum, Y., Berrios, M., & Fisher, P. A.** (1987). Biosynthesis and interconversion of Drosophila nuclear lamin isoforms during normal growth and in response to heat shock. *Journal of Cell Biology*, **105**, 771–790.
- Swift, J., Ivanovska, I. L., Buxboim, A., Harada, T., Dingal, P. C. D. P., Pinter, J., Pajeroski, D., Spinler, K. R., Shin, J. W., Tewari, M., Rehfeldt, F., Speicher, D. W., & Discher, D. E.** (2013). Nuclear Lamin-A Scales with Tissue Stiffness and Enhances Matrix-Directed Differentiation. *Science*, **341**, 965–966.
- Vigouroux, C., Auclair, M., Dubosclard, E., Pouchelet, M., Capeau, J., Courvalin, J. C., & Buendia, B.** (2001). Nuclear envelope disorganization in fibroblasts from lipodystrophic patients with heterozygous R482Q/W mutations in the lamin A/C gene. *Journal of Cell Science*, **114**, 4459–4468.
- West, G., Gullmets, J., Virtanen, L., Li, S. P., Keinänen, A., Shimi, T., Mauermann, M., Heliö, T., Kaartinen, M., Ollila, L., Kuusisto, J., Eriksson, J. E., Goldman, R. D., Herrmann, H., & Taimen, P.** (2016). Deleterious assembly of the lamin A/C mutant p.S143P causes ER stress in familial dilated cardiomyopathy. *Journal of Cell Science*, **129**, 2732–2743.
- Wu, C.** (1995). Heat shock transcription factors: Structure and regulation. *Annual Review of Cell and Developmental Biology*, **11**, 441–469.
- Zhu, W. G., Roberts, Z. V., & Dynlacht, J. R.** (1999). Heat-induced modulation of lamin B content in two different cell lines. *Journal of Cellular Biochemistry*, **75**, 620–628.

## Figure legends

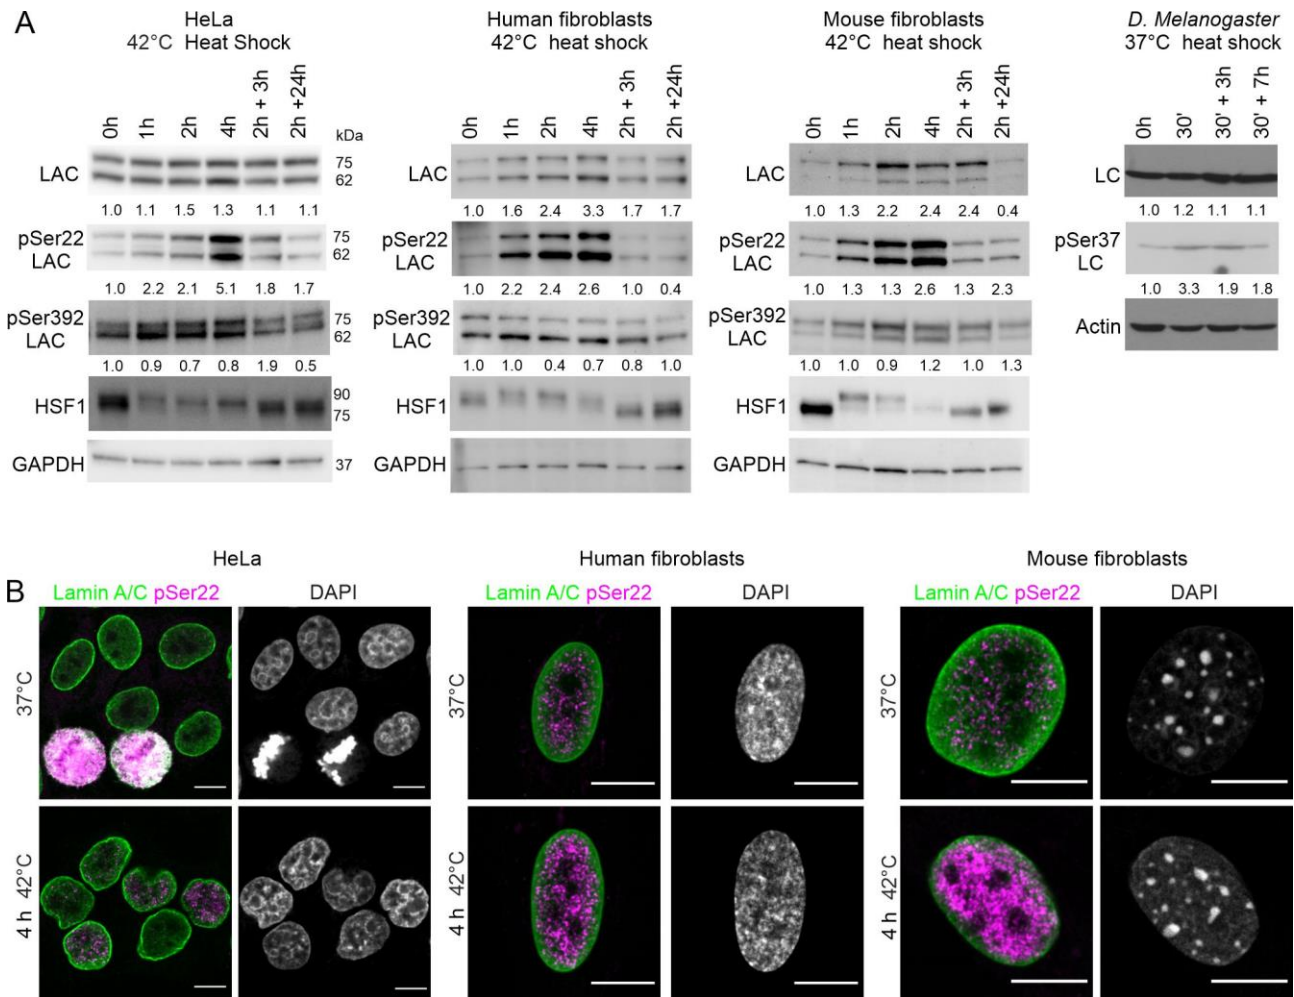

**Figure 1. Lamin A/C is phosphorylated at serine 22 upon HS.** **A)** Western blot analysis of lamin A/C (LAC), phospho-serine 22 lamin A/C (pSer22 LAC), phospho-serine 392 lamin A/C (pSer392 LAC), and heat shock factor 1 (HSF1) after 1- to 4-hour heat shock (HS) at 42°C and 3- and 24-h recovery at 37°C in HeLa cells, primary human and mouse fibroblasts. Whole *D.Melanogaster* flies were heat-shocked for 30 min at 37°C and left to recover for 3 and 7 h at 22°C. The average numerical values of signal intensities relative to loading control (GAPDH, actin) from individual experiments are shown below each blot. pSer22 and pSer392 lamin A/C levels were normalized to GAPDH and lamin A/C. (HeLa: N=6, human fibroblasts: N=3, mouse fibroblasts: N=3, *D.Melanogaster*: N=4). **B)** HeLa cells, human and mouse fibroblasts were cultured either in normal culture conditions or exposed to 4-h HS at 42°C, fixed and stained for lamin A/C (green), pSer22 lamin A/C (magenta), and DAPI (grey). Scale bar 10  $\mu$ m.

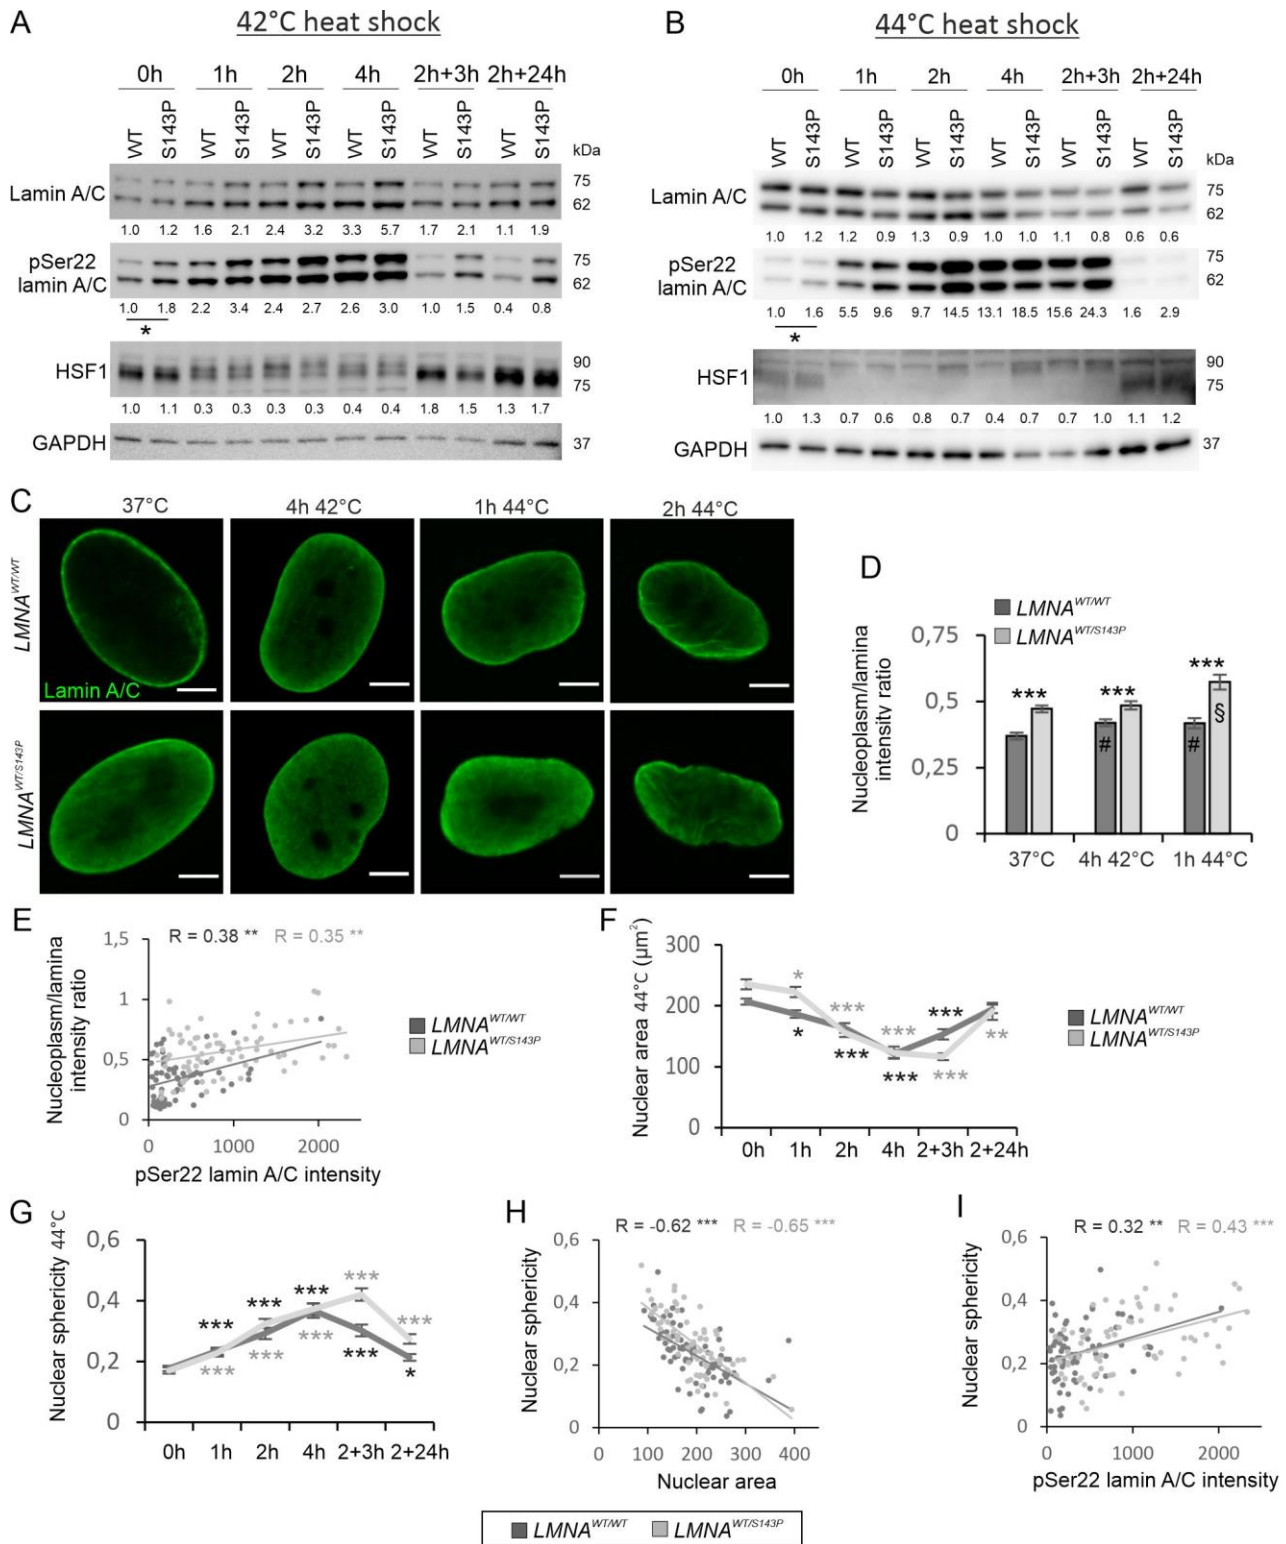

**Figure 2. Phosphorylation of lamin A/C facilitates rounding of the nucleus in response to HS.** **A-B)** Western blot analysis of control and patient fibroblasts carrying the p.S143P mutation in *LMNA* as detected with lamin A/C, pSer22 lamin A/C and HSF1 antibodies upon 1- to 4-h HS at 42°C or 44°C and at the recovery. The average numerical values of signal intensities relative to the loading control (GAPDH) are shown below each blot (N=3-5

replicates). pSer22 lamin A/C was normalized to GAPDH and lamin A/C. **C)** Confocal microscopy images of *LMNA*<sup>WT/WT</sup> and *LMNA*<sup>WT/S143P</sup> fibroblasts stained for lamin A/C at normal culture conditions, after 4-h HS at 42°C and after 1-h and 2-h HS at 44°C. Scale bar 5 µm. **D)** Lamin A/C fluorescence intensities at the lamina region and in the nucleoplasm were determined from the mid-plane confocal sections of randomly selected cells and the average ratios of the signals (nucleoplasm/lamina) were plotted (N=30-50). **E)** Scatter blot of lamin A/C nucleoplasm/lamina intensity ratio versus pSer22 lamin A/C intensity determined from randomly selected cells at 37°C and after 1- and 2-h HS at 44°C (N=70). **F-G)** Nuclear area (µm<sup>2</sup>) and nuclear sphericity of *LMNA*<sup>WT/WT</sup> and *LMNA*<sup>WT/S143P</sup> fibroblasts was determined from confocal sections of randomly selected cells at 37°C, after 1- to 4-h HS at 44°C, and after 3- and 24-h recovery at 37°C (N=50-90). **H)** Scatter blot of nuclear sphericity versus nuclear area upon 0 - 2 h HS at 44°C (N=70). **I)** Scatter blot of nuclear sphericity versus pSer22 lamin A/C intensity upon 0 - 2 h HS at 44°C (N=70). Bars express mean ± s.e.m, Pearson correlation coefficients (R) are indicated, \*p < 0.05, \*\*p < 0.01, \*\*\*p < 0.001, # p < 0.01 (*LMNA*<sup>WT/WT</sup> control vs. *LMNA*<sup>WT/WT</sup> HS), § p < 0.05 (*LMNA*<sup>WT/S143P</sup> control vs. *LMNA*<sup>WT/S143P</sup> HS).



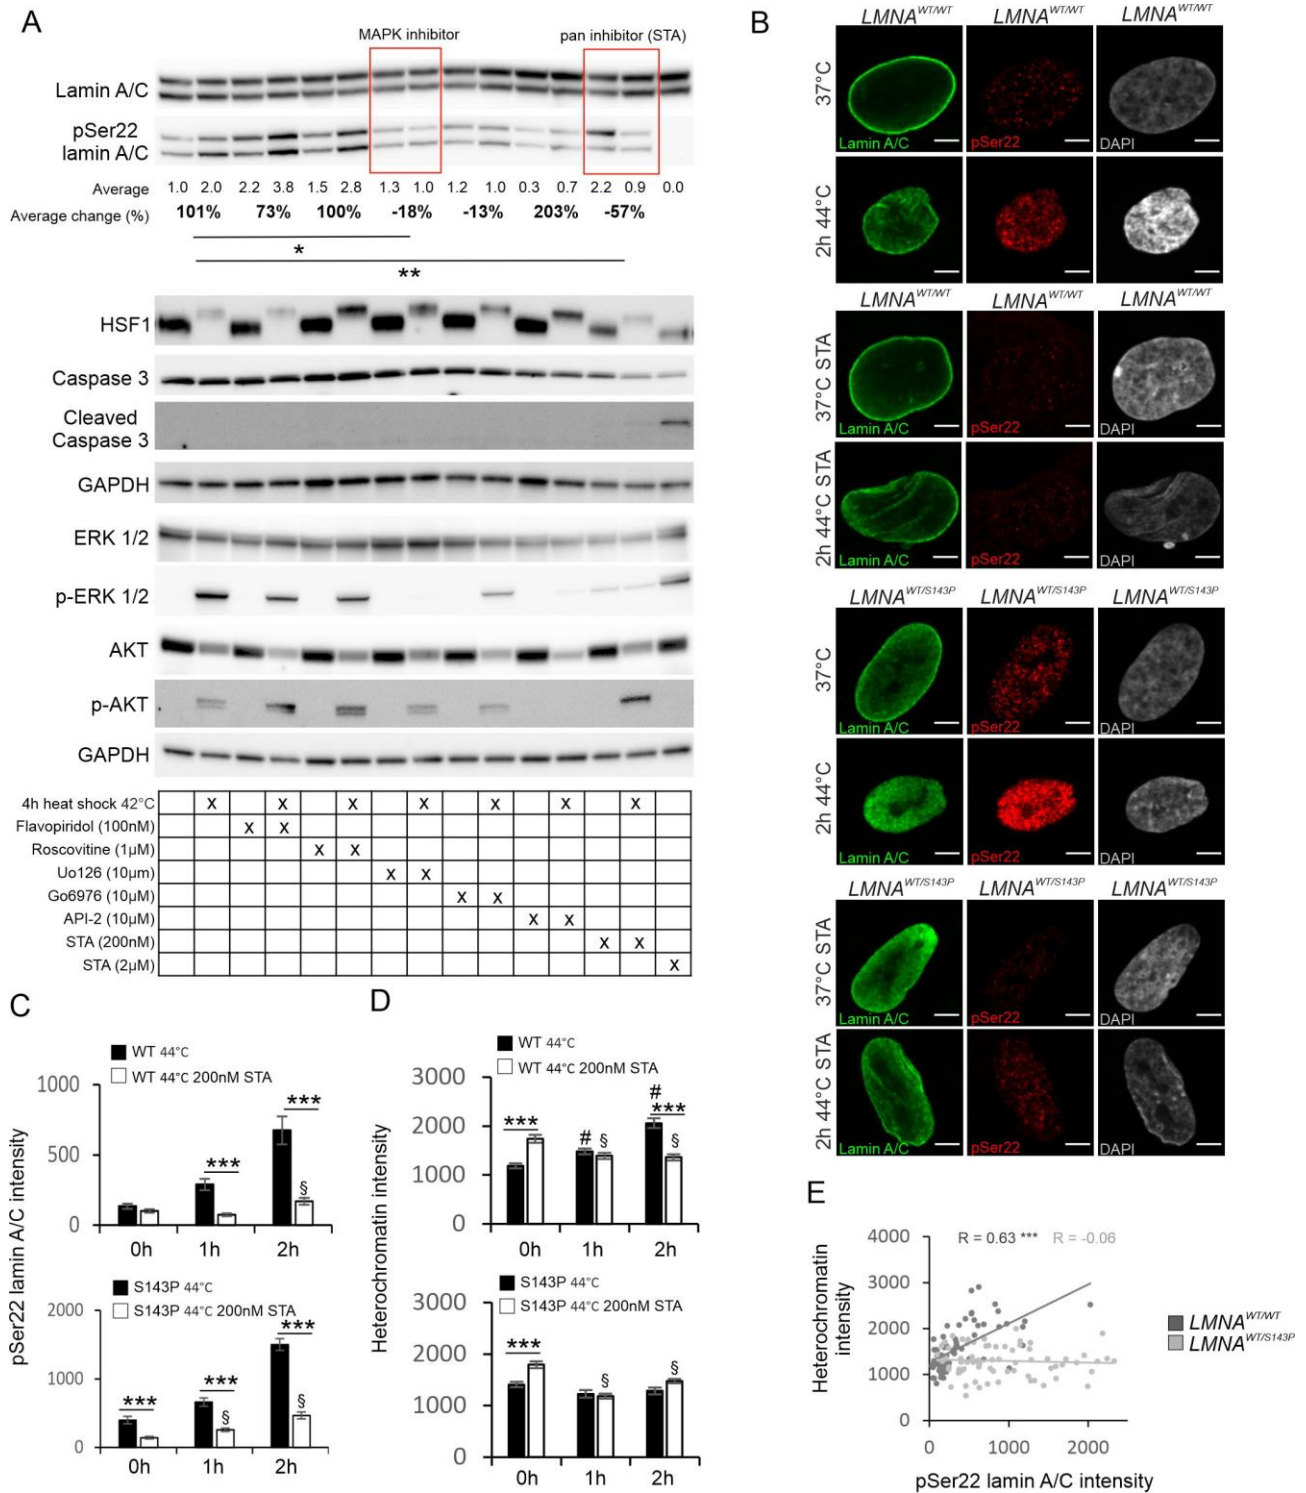

**Figure 3. The effect of kinase inhibition on lamin A/C phosphorylation under HS. A)** Immunoblots showing lamin A/C, pSer22 lamin A/C, HSF1, ERK1/2, pERK1/2, AKT, pAKT, caspase-3, and cleaved caspase-3 protein levels in control and heat-shocked HeLa cells treated with different kinase inhibitors. GAPDH was used as a loading control and HeLa cells treated with 2 µM staurosporine as a positive control for apoptotic cell death. The average numerical values of signal intensities relative to the loading control (GAPDH and

lamin A/C) and percentage of intensity change between control and heat shocked cells are shown below the blot (N=5). **B)** Confocal images of *LMNA*<sup>WT/WT</sup> and *LMNA*<sup>WT/S143P</sup> fibroblasts stained for lamin A/C (green), pSer22 lamin A/C (red) and DAPI (grey). The cells were cultured either at 37°C or heat-shocked for 1 hour at 44°C in the absence or presence of 200 nm kinase inhibitor STA. **C-D)** Intensity values of pSer22 lamin A/C and heterochromatin (DAPI) were analyzed from confocal images of *LMNA*<sup>WT/WT</sup> (top two graphs) and *LMNA*<sup>WT/S143P</sup> (lower two graphs) cells. The cells were heat shocked for 1-2 hours at 44°C in the absence or presence of 200 nm STA (N=30). **E)** Scatter blot of heterochromatin (DAPI) intensity versus pSer22 lamin A/C intensity determined from randomly selected cells at 37°C and after 1- and 2-h HS at 44°C (N=70). Bars express mean ± s.e.m, Pearson correlation coefficients (R) are indicated, \*p < 0.05, \*\*p < 0.01, \*\*\*p < 0.001, #p < 0.001 (control vs. HS), §p < 0.01 (STA control vs. STA HS).

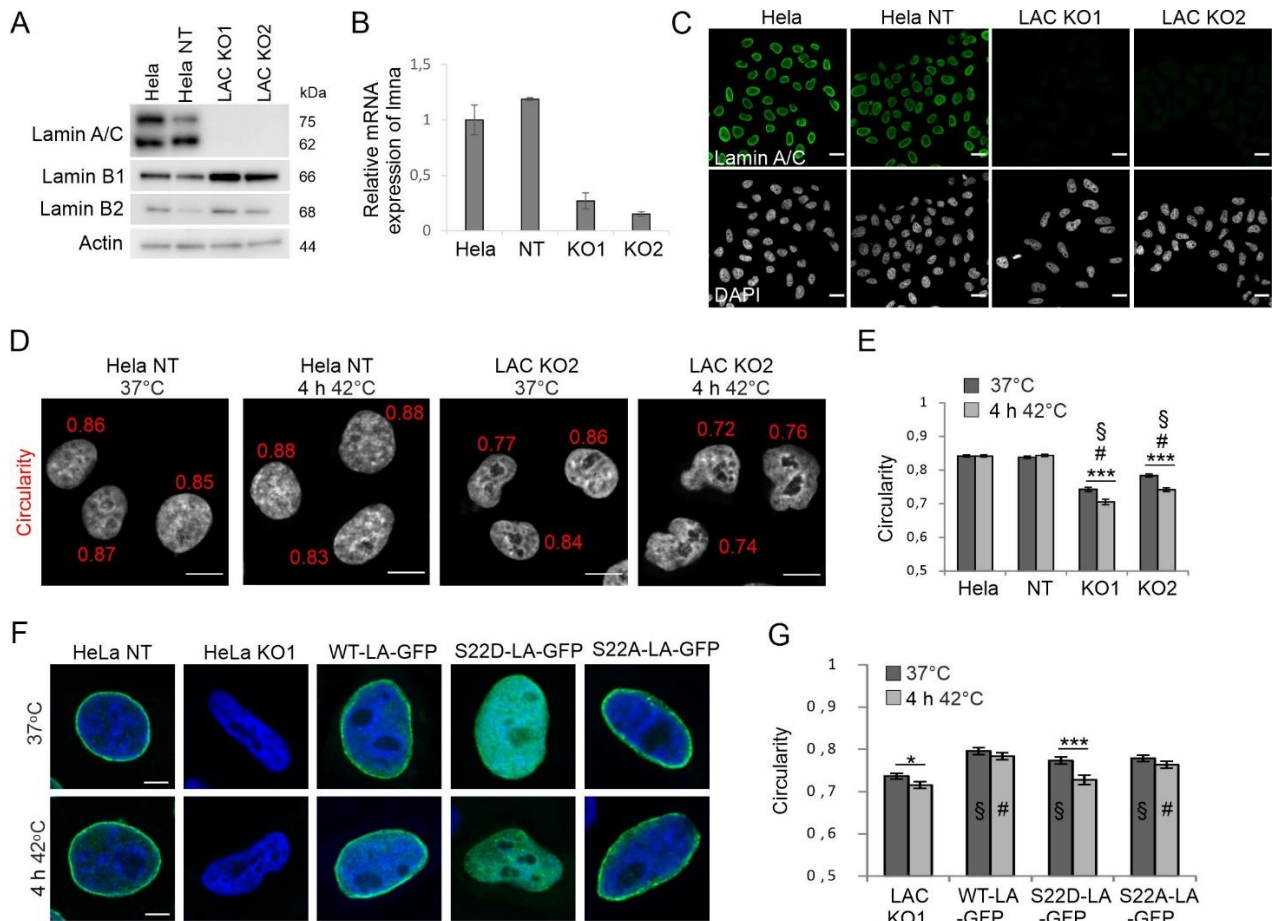

**Figure 4. Knockout of the *LMNA* gene increases nuclear deformability under normal and HS conditions. A)** Western blot analysis showing the expression of lamin A/C, lamin B1, and lamin B2 in parental HeLa cells and cells treated with non-targeting (NT) gRNA or two different lamin A/C targeting gRNAs (LAC KO1 and LAC KO2). **B)** Expression of *LMNA* mRNA in parental HeLa, NT HeLa, LAC KO1 and LAC KO2 cells. **C)** Immunofluorescence images of parental HeLa, NT HeLa, LAC KO1 and LAC KO2 cells stained with lamin A/C (green) and DAPI (gray). Scale bar 20  $\mu$ m. **D)** Representative images from nuclear circularity analysis of NT and KO2 cells at 37°C and after 4-h HS at 42°C. **E)** Nuclear circularity of parental HeLa, NT HeLa, LAC KO1 and LAC KO2 cells under normal and HS conditions (N=200, from 4 different experiments). **F)** Representative images of HeLa NT cells, untreated HeLa KO1 cells and HeLa KO1 cells transfected with WT-LA-GFP, S22D-LA-GFP or S22A-LA-GFP at normal culture conditions and after 4-h HS at 42°C. HeLa NT and HeLa KO1 were stained for lamin A/C (green). All cells were stained with DAPI (blue). **G)** Nuclear circularity of LAC KO1, WT-LA-GFP, S22D-LA-GFP and S22A-LA-GFP cells under control condition and after 4-h heat shock at 42°C (N=100). Data is expressed as mean  $\pm$  s.e.m, \* $p < 0.05$ , \*\*\* $p < 0.001$ , # $p < 0.001$  (compared to HeLa and NT HeLa), § $p < 0.001$  (compared to LAC KO1 control) ¶ $p < 0.001$  (compared to LAC KO1 HS).

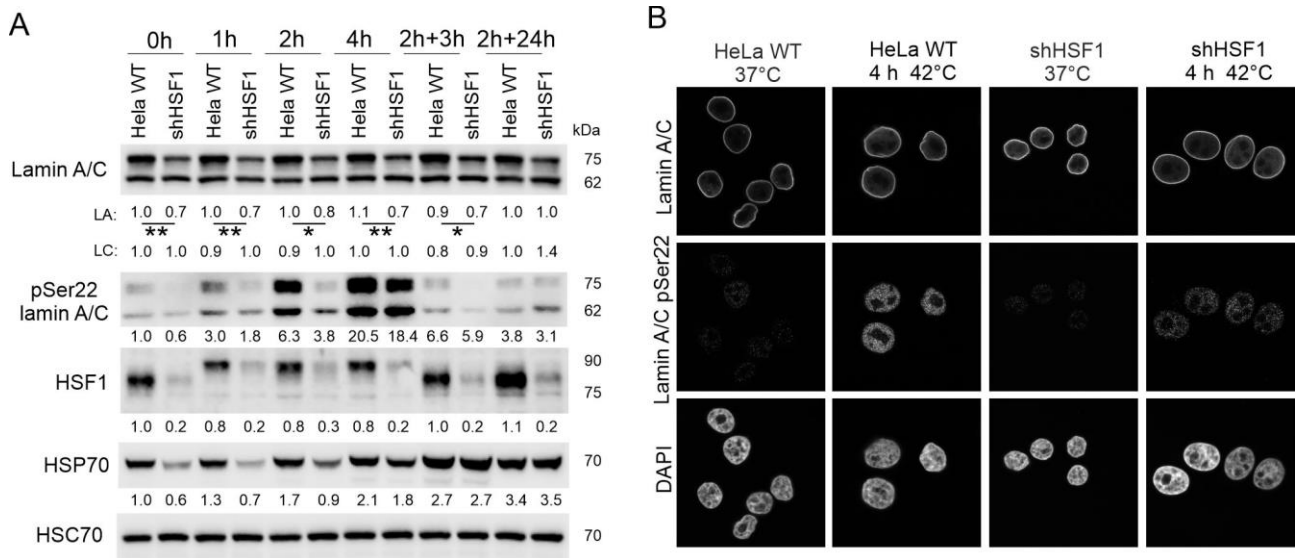

**Figure 5. Lamin A/C phosphorylation at Ser22 is independent of HSF1. A)** Western blot analysis of lamin A/C, pSer22 lamin A/C, heat shock factor 1 (HSF1), and heat shock protein 70 (HSP70) upon HS and after 3- and 24-h recovery. The average numerical values of signal intensities relative to loading control (HSC70) are shown below each blot. pSer22 lamin A/C levels were normalized to HSC70 and lamin A/C (N=5). **B)** Confocal microscopy images of parental HeLa cells and HSF1-silenced cells stained for lamin A/C, pSer22 lamin A/C and DAPI under normal culture conditions and after 4-h HS. Scale bars: 10  $\mu$ m. \*  $p < 0.05$ , \*\* $p < 0.01$ .

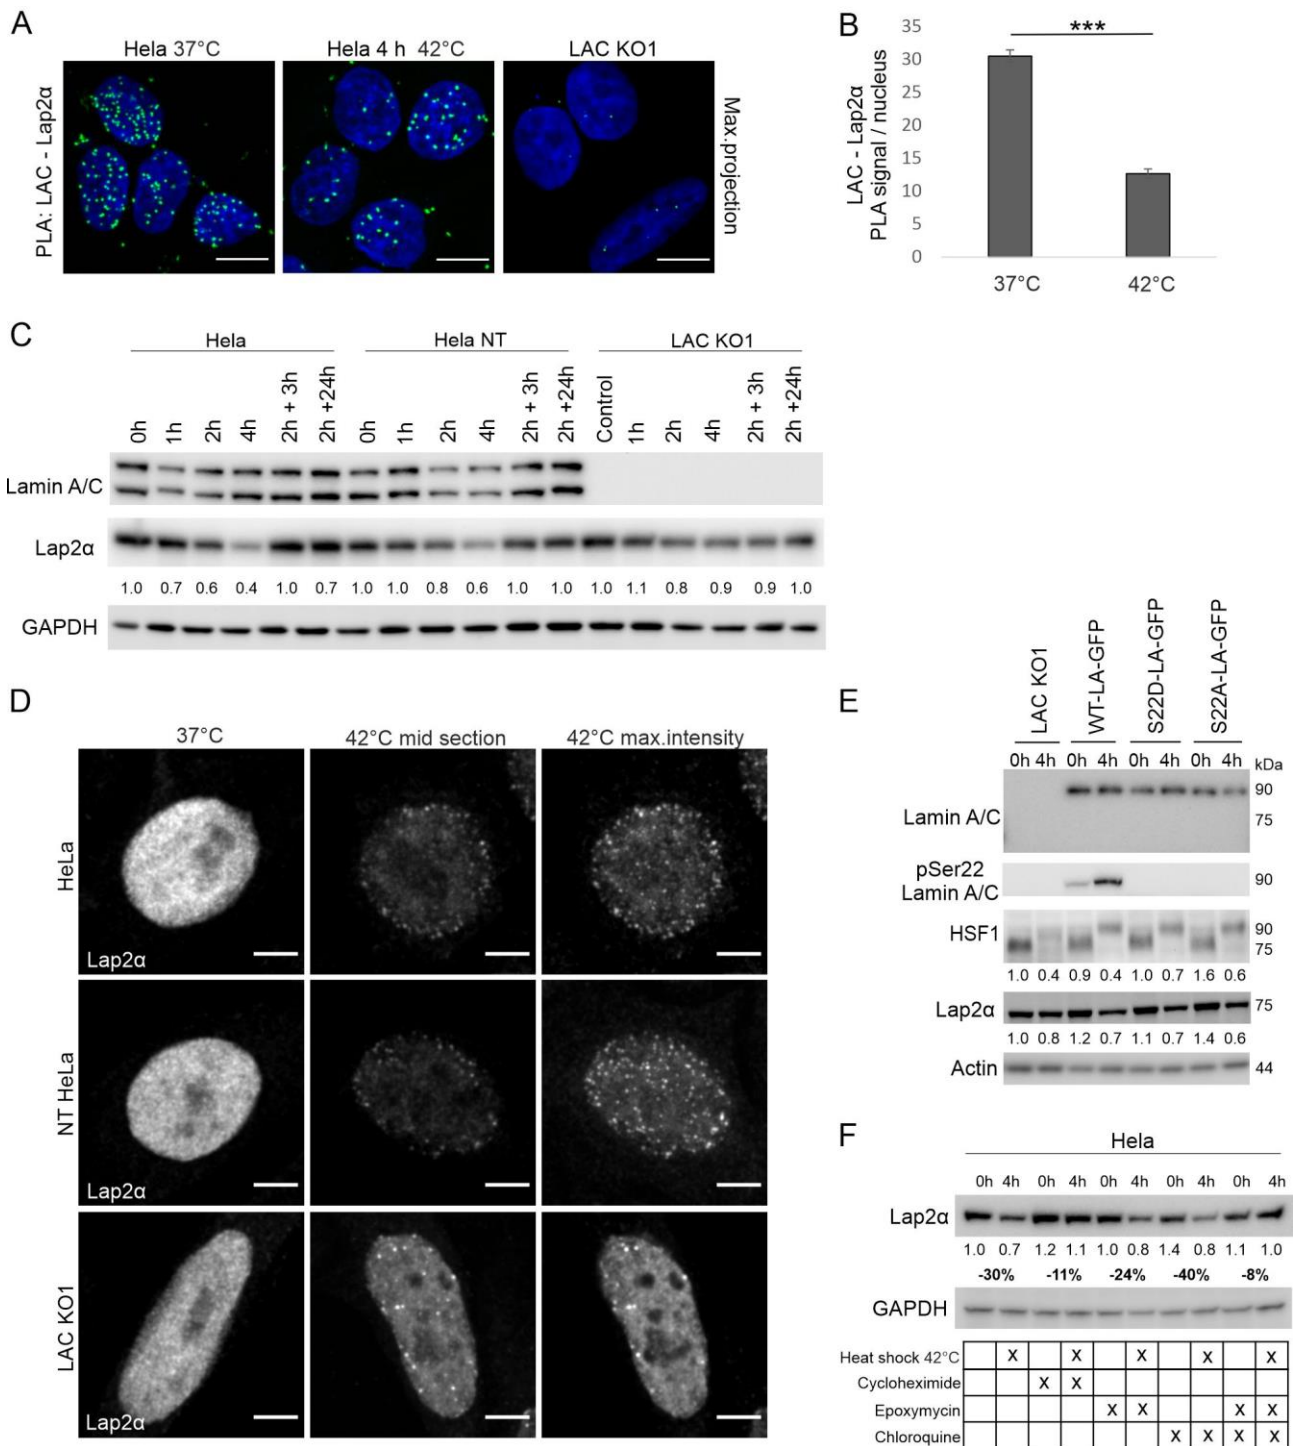

**Figure 6. Lap2α is degraded in a lamin A/C dependent manner under HS. A)** Proximity ligation assay (PLA) with lamin A/C and Lap2α antibodies was carried out on control and heat-shocked cells. Maximum projections of confocal images are shown. Scale bar 10 μm. Lamin A/C KO1 cells were used as a negative control. **B)** Quantification of PLA signals per nucleus (N=200, three individual experiments). **C)** Western blot analysis showing lamin A/C and Lap2α levels in HeLa, NT HeLa, and LAC KO1 cells at different time point under HS and at the recovery. The average numerical values of signal intensities relative to the loading

control (GAPDH) are shown below the blot. Each cell line has been normalized to its own control sample to highlight the change of Lap2 $\alpha$  protein level between the timepoints (N=3). **D)** Confocal microscopy images showing Lap2 $\alpha$  aggregation upon 4 h heat shock in Hela, NT Hela, and LAC KO1 cells. Scale bar 5  $\mu$ m. **E)** Western blot analysis of LAC KO1 cells transfected with different GFP-tagged lamin A vectors and detected with pSer22 lamin A, HSF1, and Lap2 $\alpha$  antibodies. The average numerical values of signal intensities relative to the loading control (actin) are shown below the blot (N=3). **F)** Western blot analysis of Lap2 $\alpha$  protein level in heat-shocked parental Hela cells treated with either 10  $\mu$ M CHX, 10  $\mu$ M EPO, 10  $\mu$ M CQ or both EPO and CQ. The average numerical values of signal intensities relative to the loading control (GAPDH) and percentage of intensity change between control and heat-shocked cells are shown below the blot (N=2). Data is expressed as mean  $\pm$  s.e.m, \*\*\*p < 0.001.

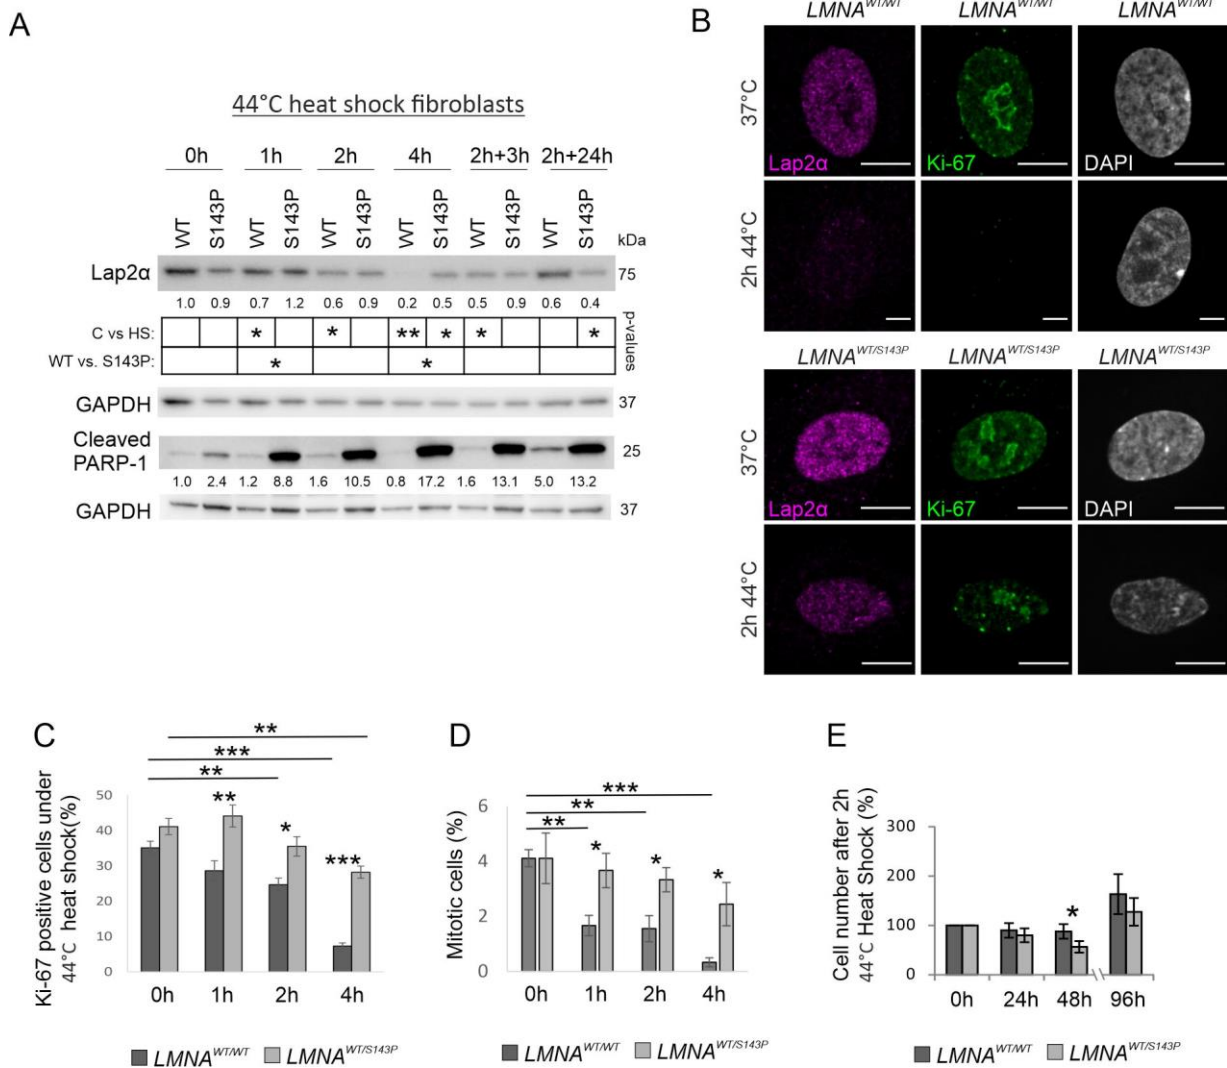

**Figure 7. *LMNA* mutant cells are hypersensitive to severe HS. A)** Western blot analysis of *LMNA*<sup>WT/WT</sup> and *LMNA*<sup>WT/S143P</sup> fibroblasts as detected with Lap2α and cleaved PARP-1 antibodies. The average numerical values of signal intensities relative to the loading control (GAPDH) are shown below each blot (N=3-5). **B)** Representative confocal images of *LMNA*<sup>WT/WT</sup> and *LMNA*<sup>WT/S143P</sup> cells cultured in normal conditions or exposed to 44°C for 2 hours prior to fixation. The cells were stained for Lap2α (magenta), Ki-67 (green) and DAPI (grey). **C)** The percentage of Ki-67 positive cells at 37°C and after 1- – 4-h at 44°C (N=1200). **D)** The percentage of mitotic cells at 37°C and after 1- to 4-h HS at 44°C (N=900). **E)** Cell numbers counted after 2-h HS at 44°C (time point 0 h) and after 24-, 48-, and 96-h recovery period at 37°C (N=6). Data is expressed as mean ± s.e.m, \*\*\* p < 0.001, \*\* p < 0.01, \* p < 0.05.
